# Supplementary material
Source: PubMed Central journal article supplement (PMC2766675)
Supplement: blood-2009-02-205815_1.pdf [file blood-2009-02-205815_1.pdf]

---

| Genotype | WBC            | NE            | LY            | MO            | RBC           | PLT              |
|----------|----------------|---------------|---------------|---------------|---------------|------------------|
|          | (k/ $\mu$ l)   | (k/ $\mu$ l)  | (k/ $\mu$ l)  | (k/ $\mu$ l)  | (k/ $\mu$ l)  | (k/ $\mu$ l)     |
| +/+      | 12.2 $\pm$ 1.9 | 2.4 $\pm$ 0.5 | 9.3 $\pm$ 1.4 | 0.3 $\pm$ 0.1 | 8.6 $\pm$ 0.4 | 404.8 $\pm$ 68.3 |
| -/-      | 10.9 $\pm$ 0.6 | 2.4 $\pm$ 0.2 | 8.1 $\pm$ 0.5 | 0.3 $\pm$ 0.0 | 8.2 $\pm$ 0.4 | 504.6 $\pm$ 34.5 |

---

WBC: white blood count cell, NE: neutrophils, LY: lymphocytes, MO: monocytes, RBC: red blood cells, PLT: platelets
