# Supplementary material
Source: PubMed Central journal article supplement (PMC2766675)
Supplement: blood-2009-02-205815_2.pdf [file blood-2009-02-205815_2.pdf]

| Transplant        | Organ | Genotype | B220+ cells(%) | CD3+ cells (%) | Mac1+ or Gr-1+ cells (%) |
|-------------------|-------|----------|----------------|----------------|--------------------------|
| 1 <sup>st</sup> T | PB    | +/+      | 59.0±7.2       | 12.9±7.0       | 20.0±6.8                 |
|                   |       | -/-      | 64.3±9.6       | 11.6±5.5       | 15.7±2.1                 |
| 1 <sup>st</sup> T | BM    | +/+      | 27.5±7.0       | 4.0±2.1        | 68.2±7.5                 |
|                   |       | -/-      | 26.2±2.1       | 2.8±0.5        | 70.2±3.0                 |
| 2 <sup>nd</sup> T | PB    | +/+      | 52.9±4.8       | 28.4±5.0       | 18.8±1.6                 |
|                   |       | -/-      | 51.7±3.1       | 27.6±2.7       | 20.2±2.8                 |
| 2 <sup>nd</sup> T | BM    | +/+      | 28.6±11.4      | 6.0±4.3        | 61.8±4.8                 |
|                   |       | -/-      | 23.3±5.9       | 4.6±4.2        | 69.0±4.8                 |
| 3 <sup>rd</sup> T | PB    | -/-      | 42.2±16.6      | 8.1±2.9        | 40.8±15.1                |
| 3 <sup>rd</sup> T | BM    | -/-      | 10.2±5.3       | 1.4±0.5        | 86.1±6.1                 |

B (B220), T (CD3ε) and myeloid (Mac-1 and Gr-1) cells were analyzed by FACS on gated CD45.2+ PB or BM cells 4 months post transplantation. Data shown are the representative experiment from 3 independent experiments, and represent the percentage of each lineage in donor-derived cells (mean ± SD, n=6–10)
